# Supplementary material
Source: PubMed Central journal article supplement (PMC10233265)
Supplement: mic-168-1182-s001.pdf [file mic-168-1182-s001.pdf]

## Supporting information for:

### Inhibition of *Streptococcus pneumoniae* growth by masarimycin.

Brad A Haubrich<sup>a,e#</sup>, Saman Nayyab<sup>a,ff</sup>, Mika Gallati<sup>a</sup> Jazmeen Hernandez<sup>a</sup>, Caroline Williams<sup>a</sup>, Andrew Whitman<sup>a</sup>, Tahl Zimmerman<sup>d</sup>, Qiong Li<sup>g</sup>, Yuxing Chen<sup>g</sup>, Cong-Zhao Zhou<sup>g</sup>, Amit Basu<sup>b\*</sup>, Christopher W Reid<sup>a,\*</sup>

---

[a] Center for Health and Behavioral Sciences, Dept. of Science and Technology, Bryant University, Smithfield, RI

\*Corresponding authors E-mail: [creid@bryant.edu](mailto:creid@bryant.edu), [abasu@brown.edu](mailto:abasu@brown.edu)

[b] Dept of Chemistry, Brown University, Providence, RI

[c] Flow Cytometry and Sorting Facility, Brown University, Providence, RI

[d] Dept. of Family and Consumer Sciences, North Carolina A&T State University Greensboro, NC

[e] Touro University Nevada, College of Osteopathic Medicine, Dept of Basic Sciences Henderson, NV, 89014

[f] University of Massachusetts Amherst, Dept. of Molecular and Cellular Biology Amherst, MA

[g] School of Life Sciences, University of Science and Technology of China, Hefei, Anhui, P.R. China

# both authors contributed equally to this work

### Table of Contents

|                                                                                                                                                                                                                                                                                                                                                                                                                                                            |   |
|------------------------------------------------------------------------------------------------------------------------------------------------------------------------------------------------------------------------------------------------------------------------------------------------------------------------------------------------------------------------------------------------------------------------------------------------------------|---|
| <b>Figure S1.</b> Structures of the diamide library screened against <i>Streptococcus pneumoniae</i> .....                                                                                                                                                                                                                                                                                                                                                 | 2 |
| <b>Figure S2.</b> Bacteriostatic assay for masarimycin against <i>S. pneumoniae</i> R6.....                                                                                                                                                                                                                                                                                                                                                                | 2 |
| <b>Figure S3.</b> Minimum inhibitory concentration assays for <i>S. pneumoniae</i> strains 6305, R6, and TIGR4 (A), and screen against <i>C. difficile</i> , <i>S. aureus</i> , and <i>E. coli</i> at 150 $\mu$ M masarimycin to assess compound spectrum.....                                                                                                                                                                                             | 3 |
| <b>Figure S4.</b> Phenotypic analysis of wild-type <i>S. pneumoniae</i> R6 in the presence of sub-MIC (0.7x) of antibiotics with well-defined modes of action or with masarimycin. Cells were treated for 90 min with antibiotic or vehicle control, fixed in 20 mM HEPES pH 7.0, 1% formaldehyde, and stained with methylene blue. Images were acquired at 1000x magnification. ....                                                                      | 4 |
| <b>Figure S5.</b> Changes in wall teichoic acid (WTA) and cell surface protein profiles in <i>S. pneumoniae</i> under sub-MIC (0.75x) treatment with masarimycin. (A) Wall teichoic acid profile, (B) profile of cell-wall associated proteins after high pH (pH 12.0), arrows with corresponding numbers indicate bands that were selected for protein identification by mass spectrometry (Table 1). Inset: changes to phosphocholine levels in WTA..... | 5 |

**Figure S6.** Ratios of NADP<sup>+</sup>/NADPH in *S. pneumoniae* in the presence of masarimycin ..... 6

**Figure S7.** Evaluation of masarimycin (mas) to interact with DNA. (A) Inhibition of potential masarimycin inhibition of Dnase activity, EDTA is used as a positive control for Dnase inhibition. (B) Evaluation of masarimycin's ability to intercalate DNA, positive control actinomycin D (ACD)

7

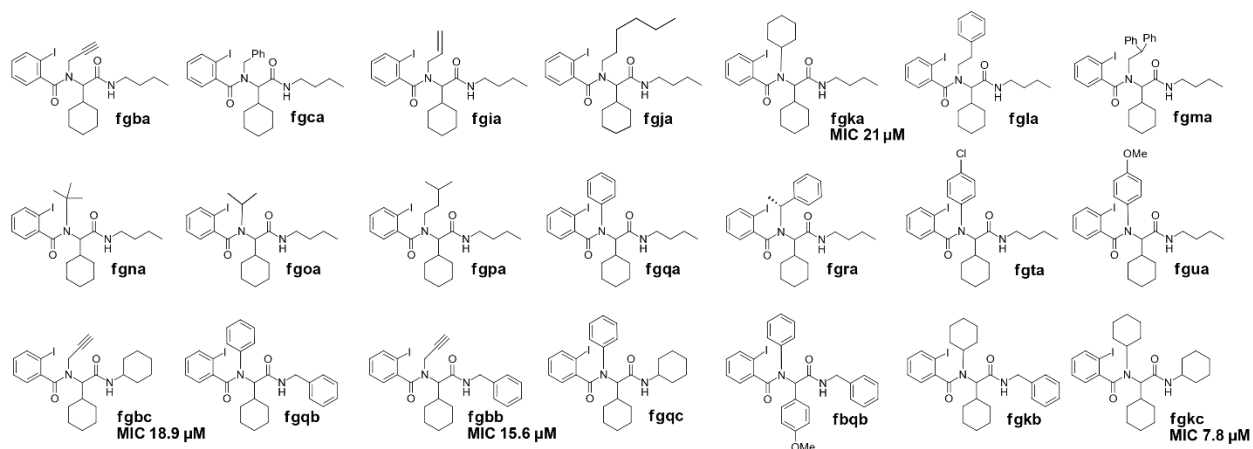

**Figure S1.** Structures of the diamide library screened against *Streptococcus pneumoniae*.

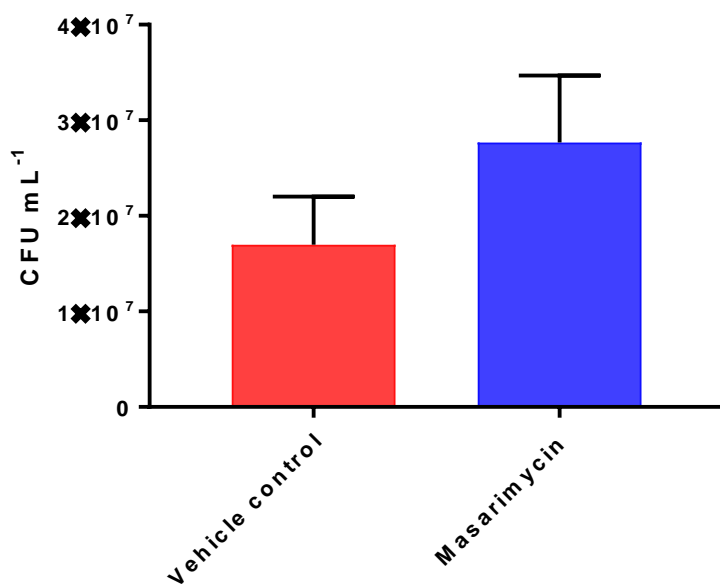

**Figure S2.** Bacteriostatic assay for masarimycin against *S. pneumoniae* R6

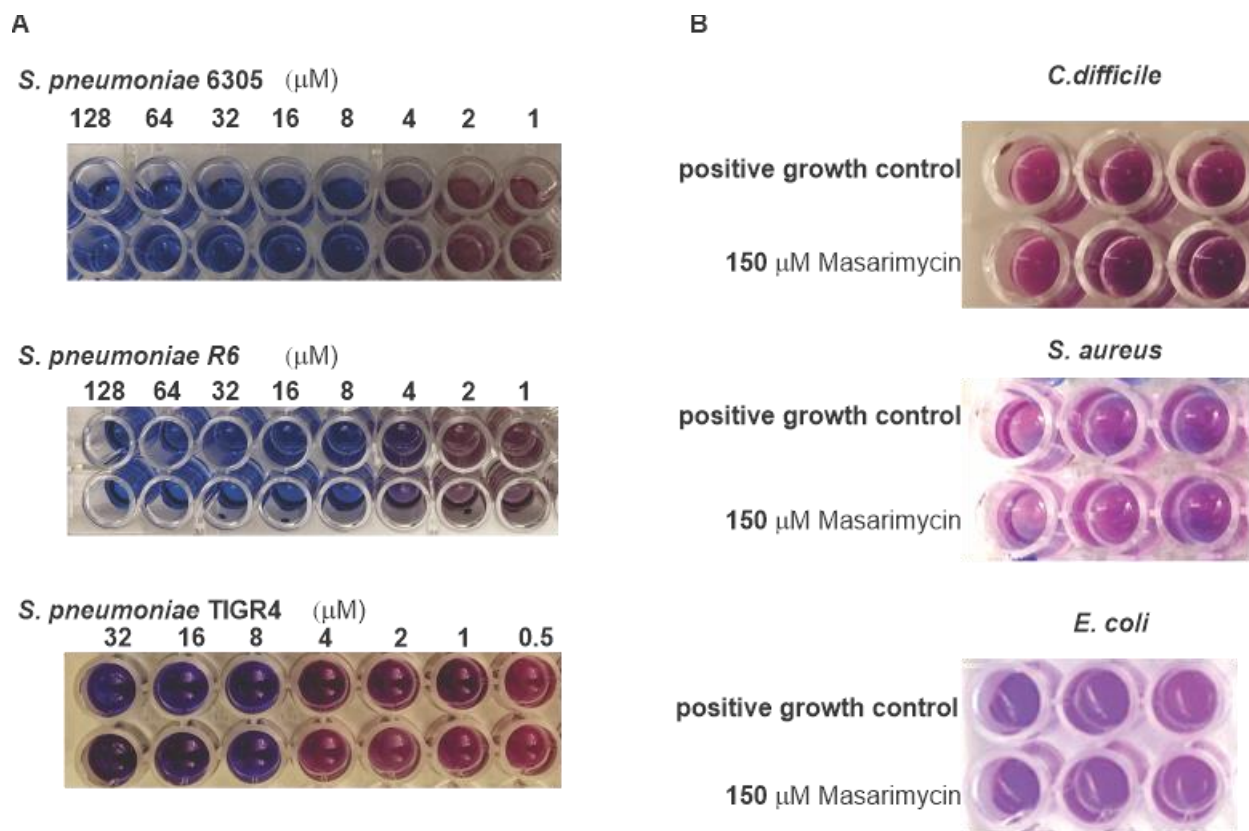

**Figure S3.** Minimum inhibitory concentration assays for *S. pneumoniae* strains 6305, R6, and TIGR4 (A), and screen against *C. difficile*, *S. aureus*, and *E. coli* at 150  $\mu\text{M}$  masarimycin to assess compound spectrum.

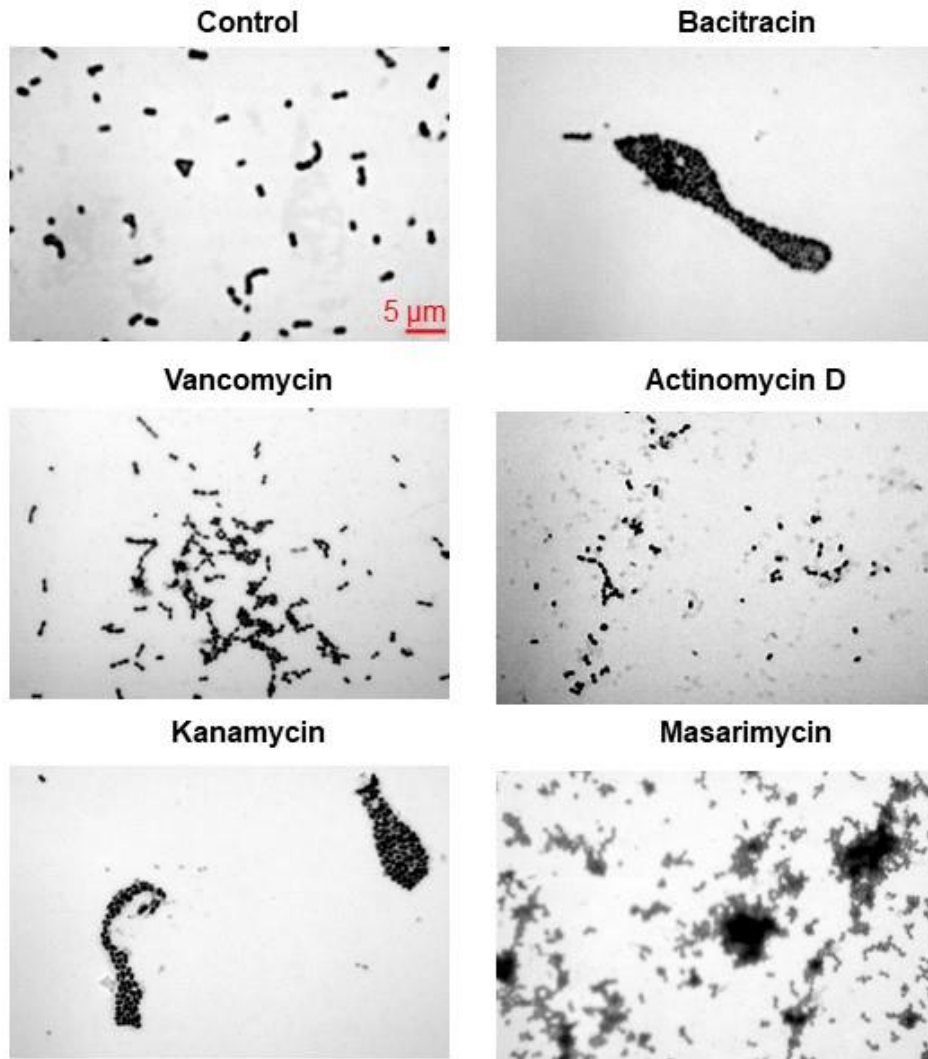

**Figure S4.** Phenotypic analysis of wild-type *S. pneumoniae* R6 in the presence of sub-MIC (0.7x) of antibiotics with well-defined modes of action or with masarimycin. Cells were treated for 90 min with antibiotic or vehicle control, fixed in 20 mM HEPES pH 7.0, 1% formaldehyde, and stained with methylene blue. Images were acquired at 1000x magnification.

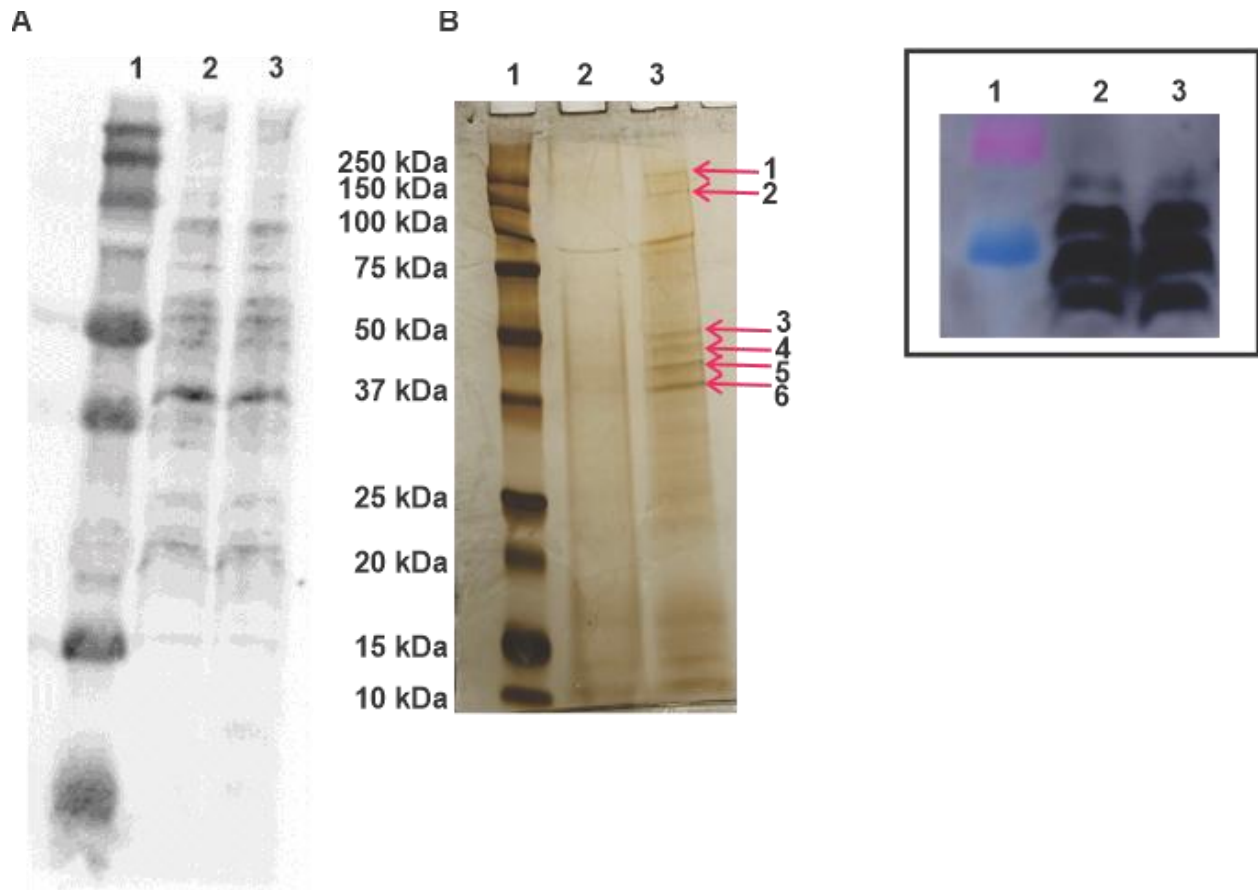

**Figure S5.** Changes in wall teichoic acid (WTA) and cell surface protein profiles in *S. pneumoniae* under sub-MIC (0.75x) treatment with masarimycin. (A) Wall teichoic acid profile, (B) profile of cell-wall associated proteins after high pH (pH 12.0), arrows with corresponding numbers indicate bands that were selected for protein identification by mass spectrometry (Table 1). Inset: changes to phosphocholine levels in WTA. Lane 1, MW marker; Lane 2, Control; Lane 3, masarimycin treatment.

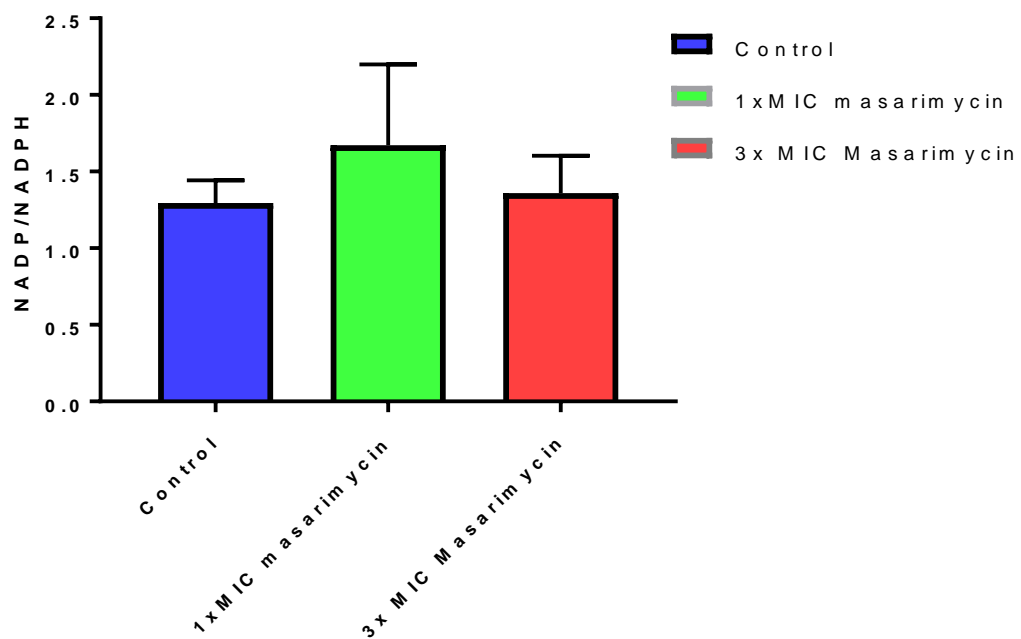

**Figure S6.** Ratios of NADP<sup>+</sup>/NADPH in *S. pneumoniae* in the presence of masarimycin

A

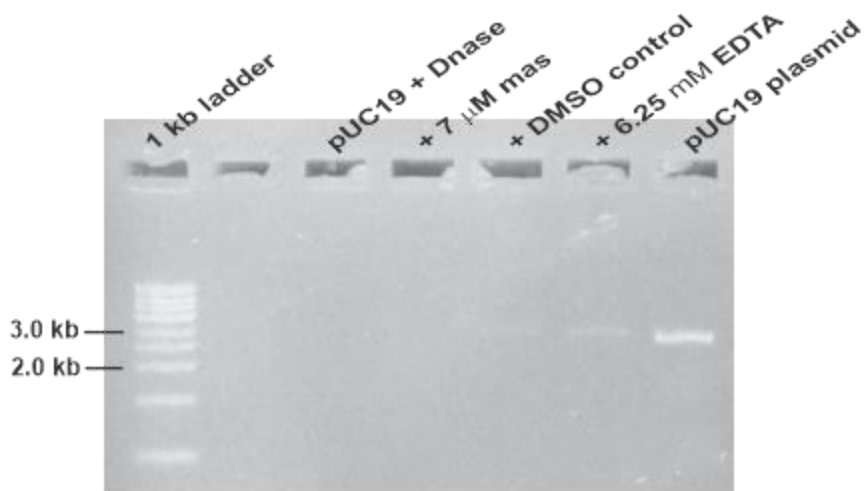

B

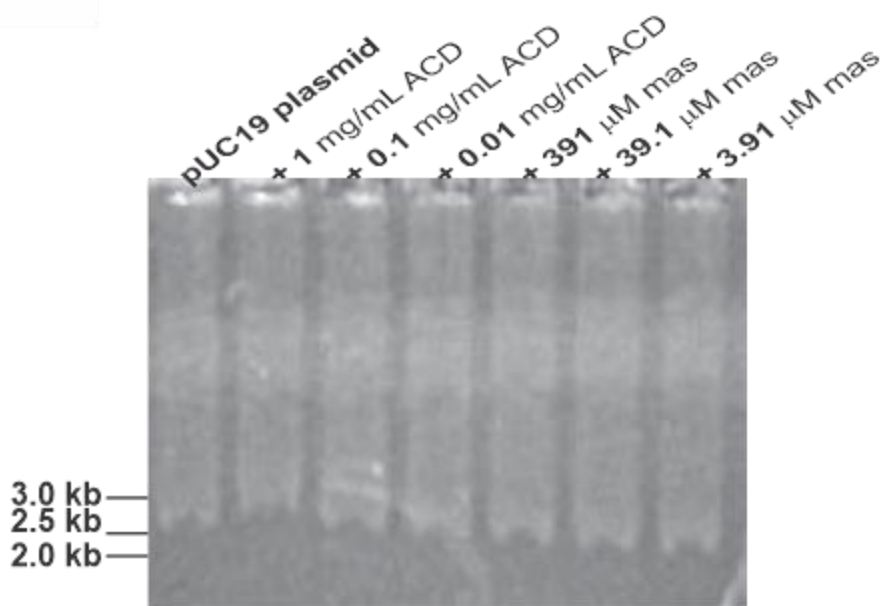

**Figure S7.** Evaluation of masarimycin (mas) to interact with DNA.(A) Inhibition of potential masarimycin inhibition of Dnase activity, EDTA is used as a positive control for Dnase inhibition. (B) Evaluation of masarimycin's ability to intercalate DNA, positive control actinomycin D (ACD)
